# Supplementary material for: Evolutionary analysis of genes coding for Cysteine-RIch Secretory Proteins (CRISPs) in mammals
Source: PubMed Central journal article supplement (PMC7278046; doi:10.1186/s12862-020-01632-5), 2020-06-08
Supplement: 12862_2020_1632_MOESM2_ESM.pdf [file 12862_2020_1632_MOESM2_ESM.pdf]

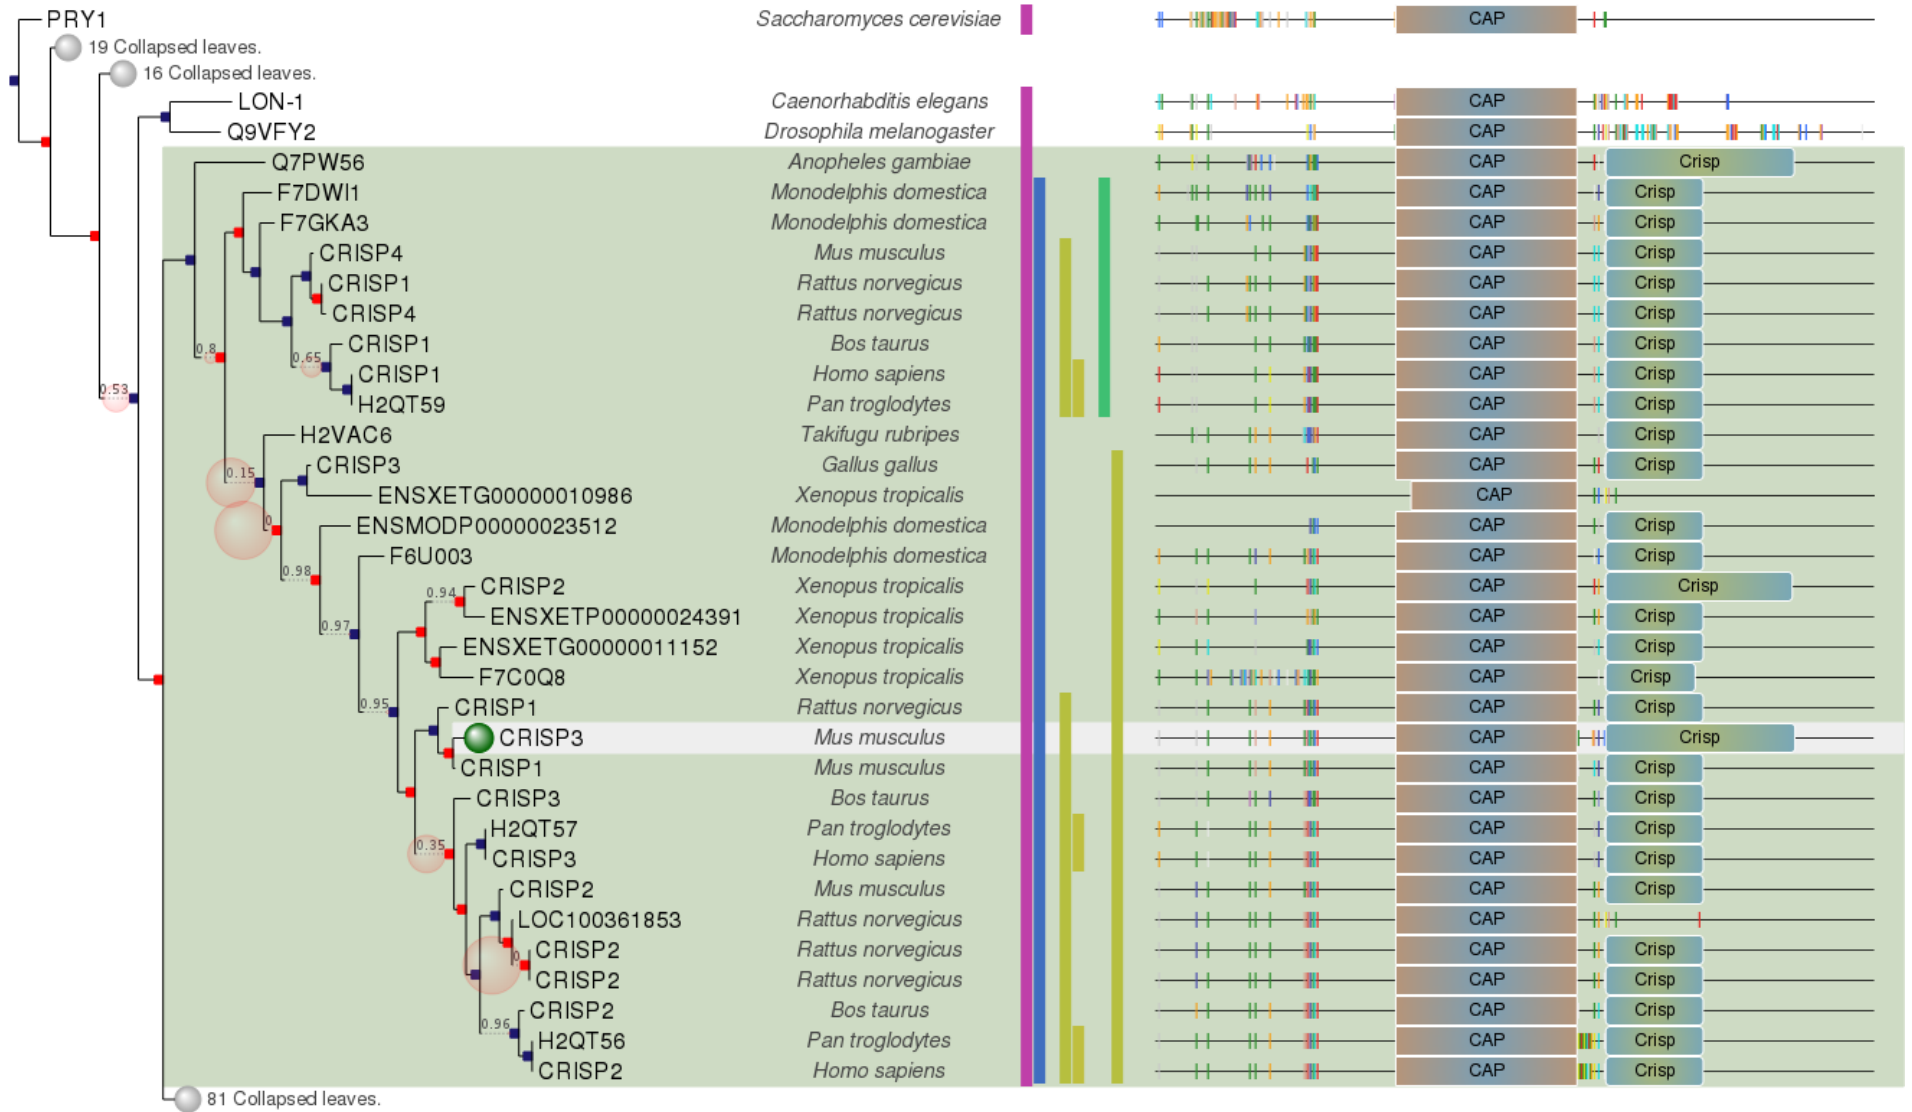

Additional file 2. PhylomeDB tree of seeding on mouse CRISP3 (EVAC4). (<http://phylomedb.org> 28-July-2017)
