# Supplementary material for: Evolutionary analysis of genes coding for Cysteine-RIch Secretory Proteins (CRISPs) in mammals
Source: PubMed Central journal article supplement (PMC7278046; doi:10.1186/s12862-020-01632-5), 2020-06-08

Additional file 5. *Crisp2 (Evac2)* gene sequence alignment.

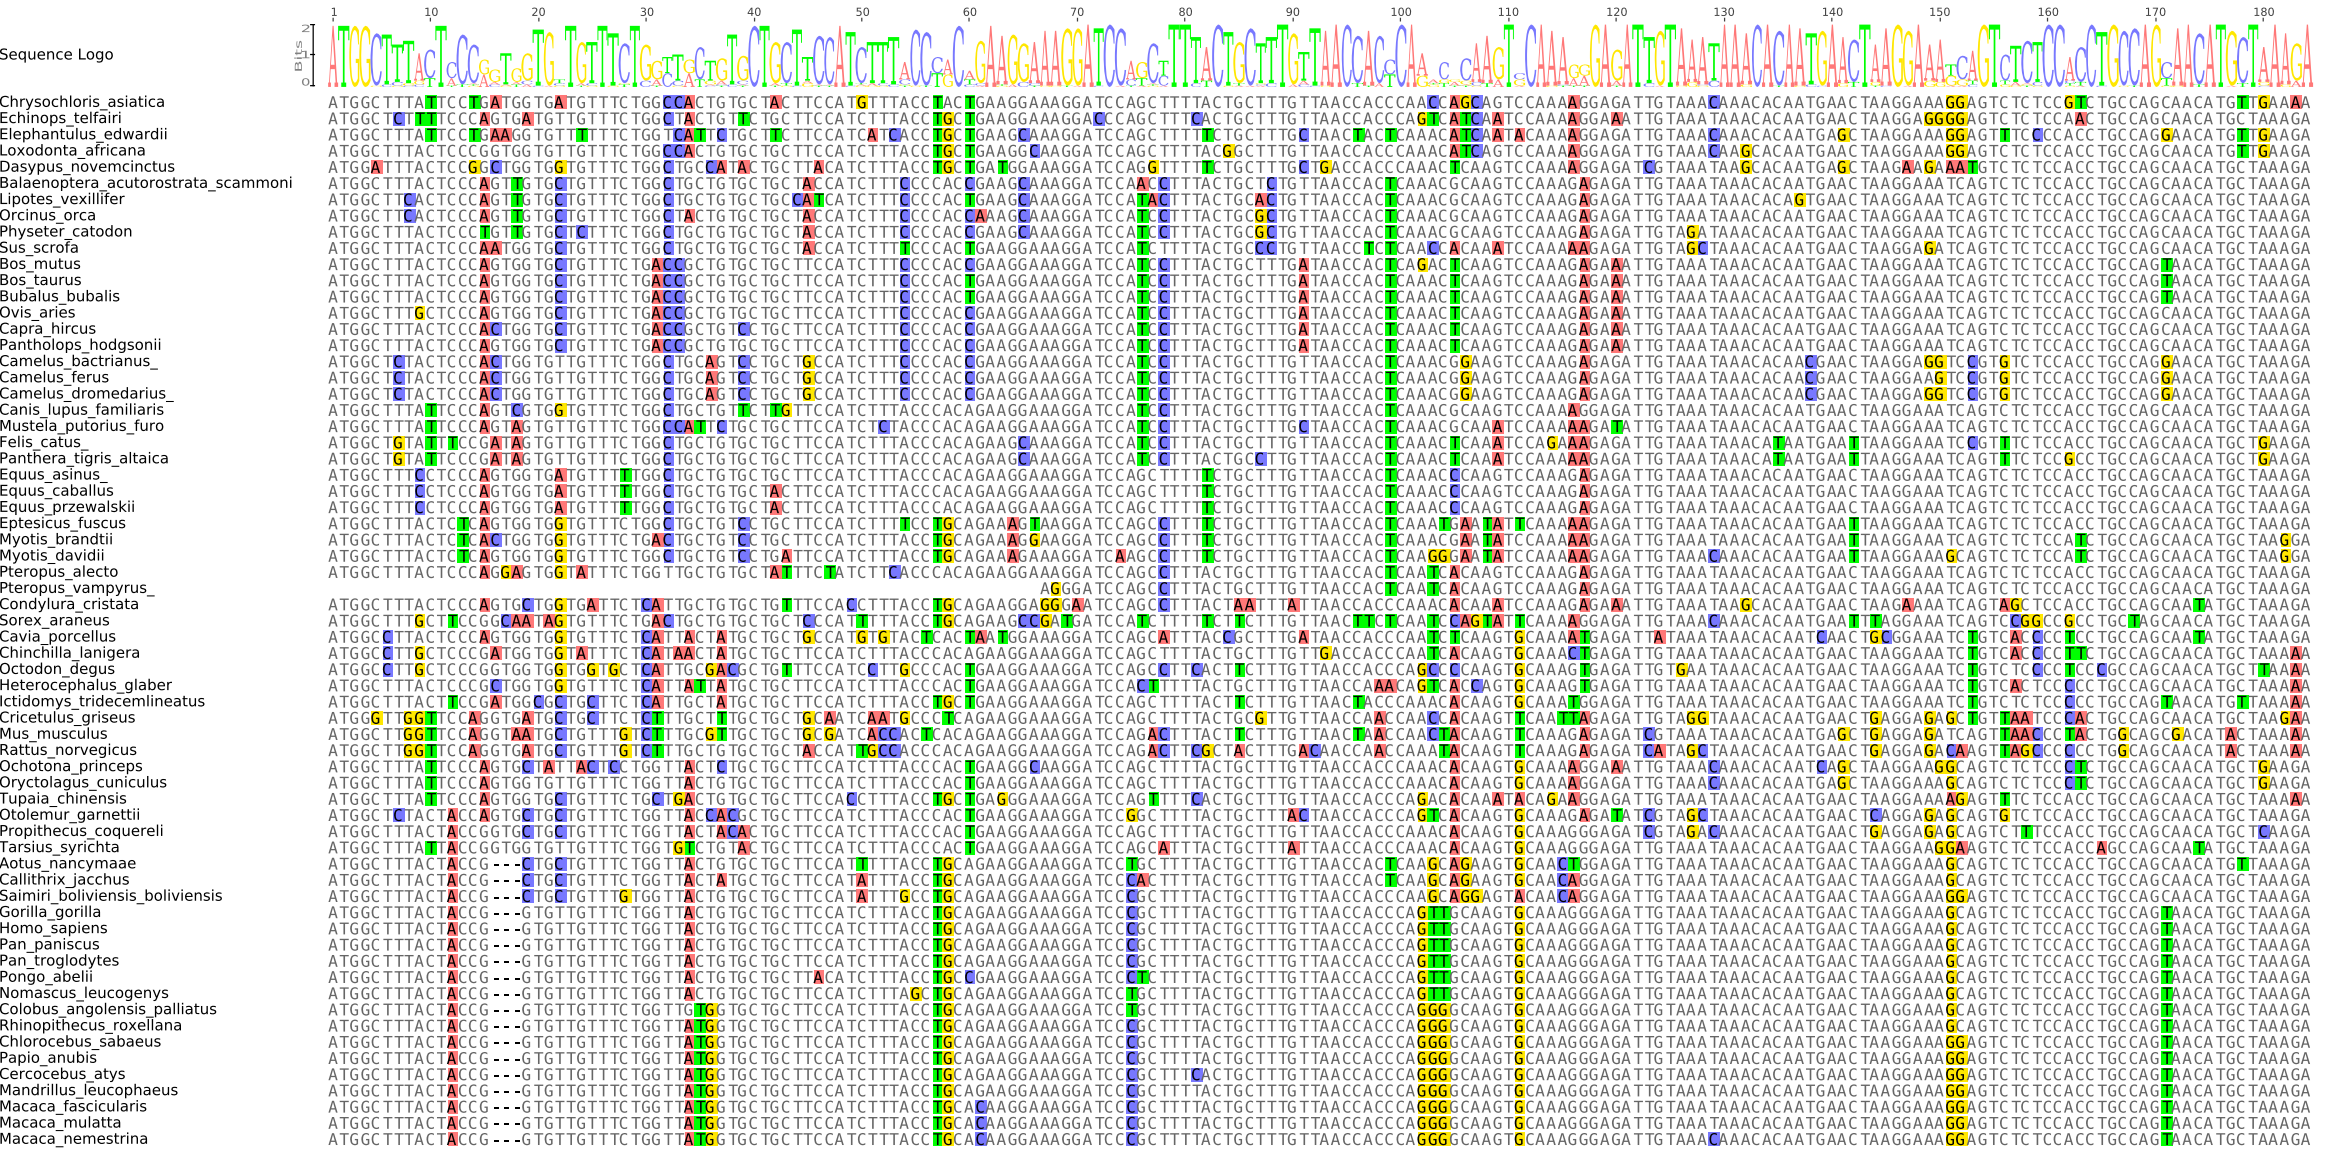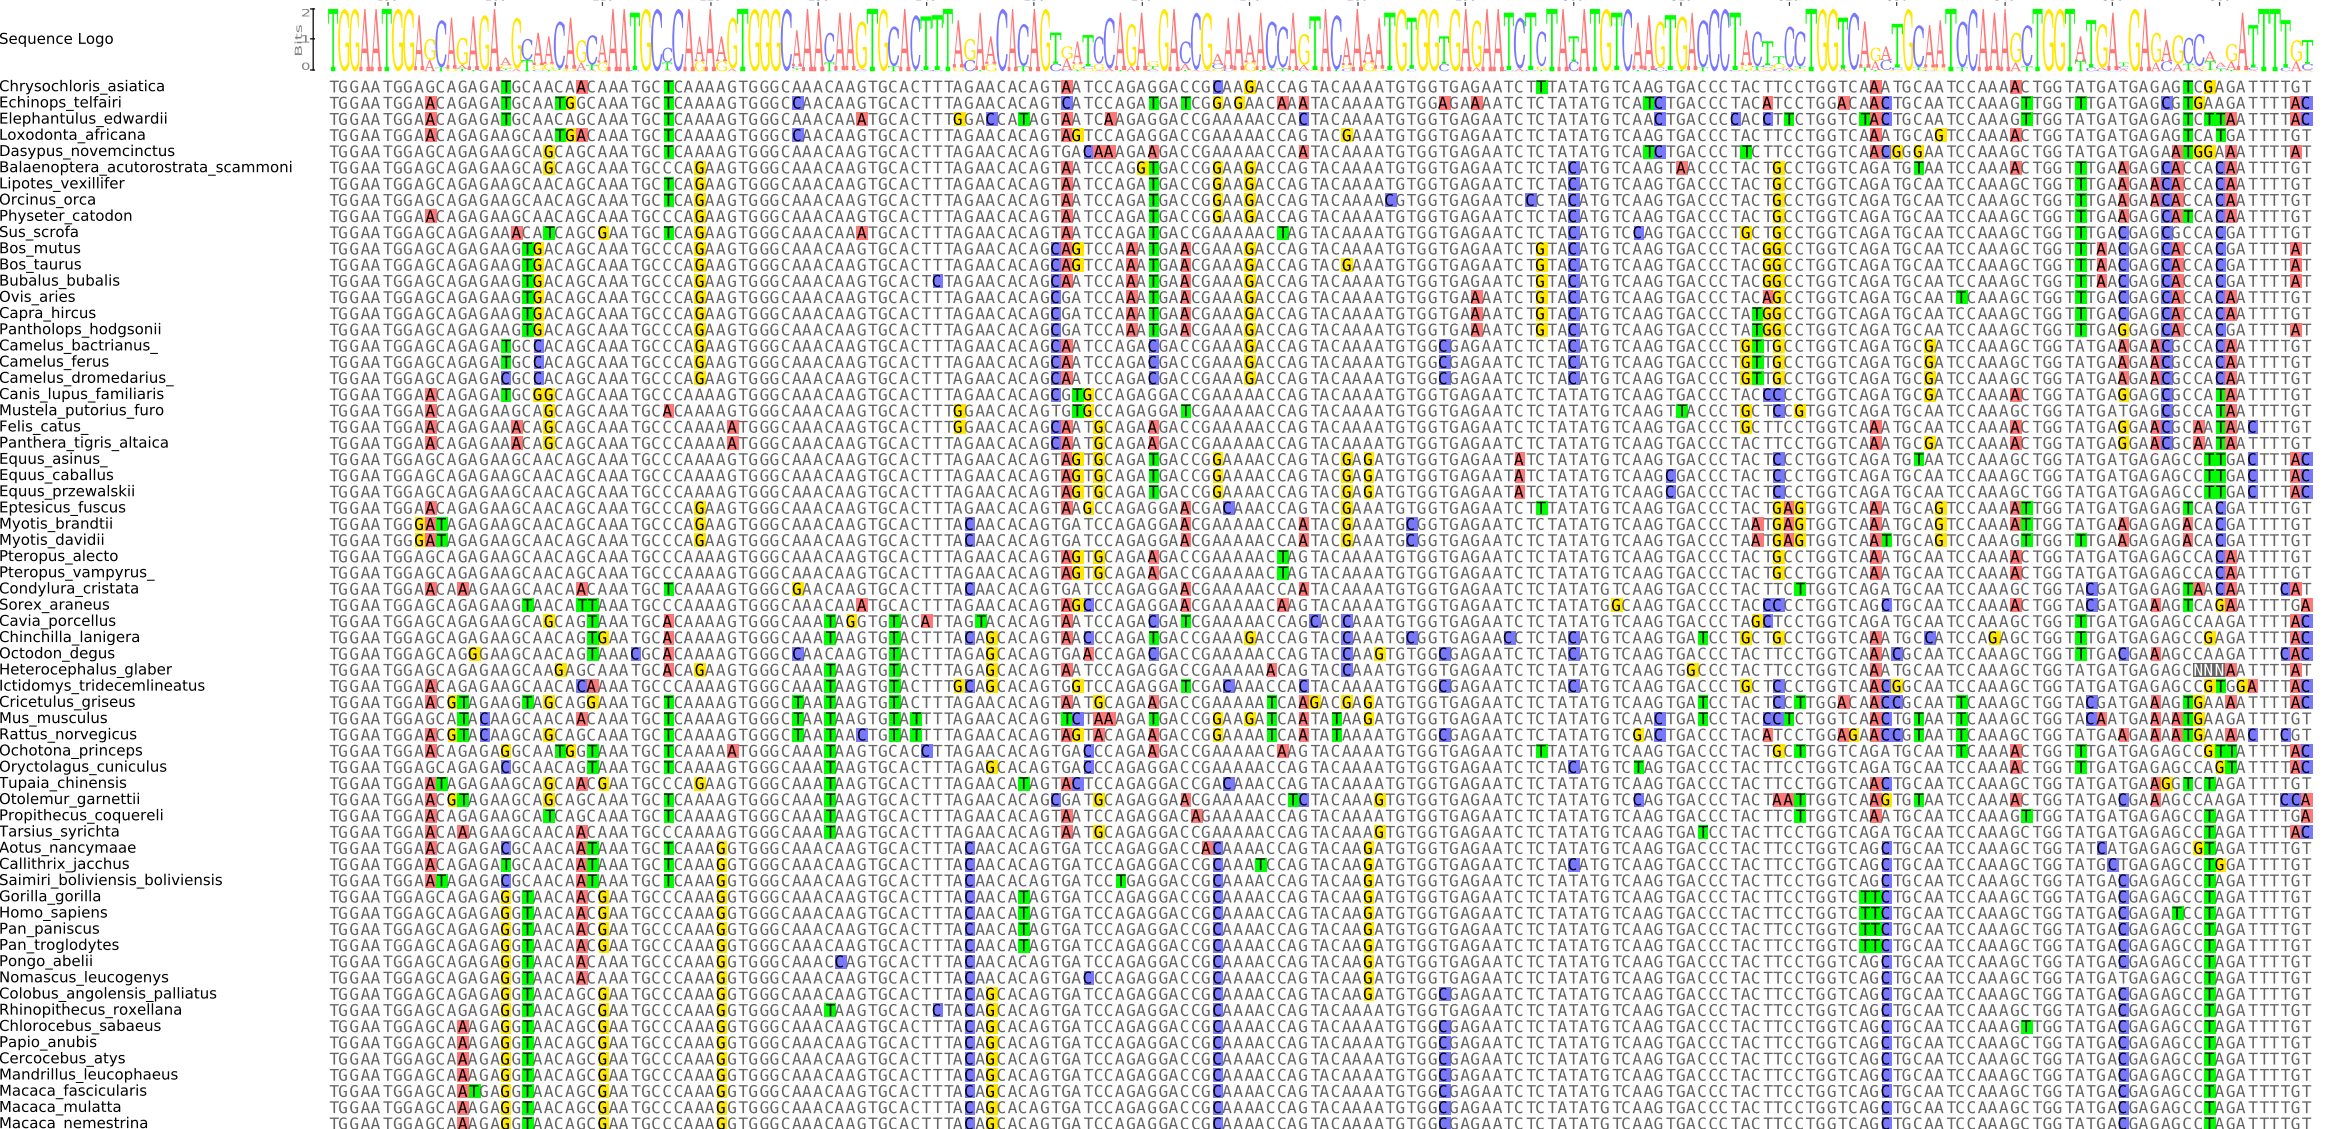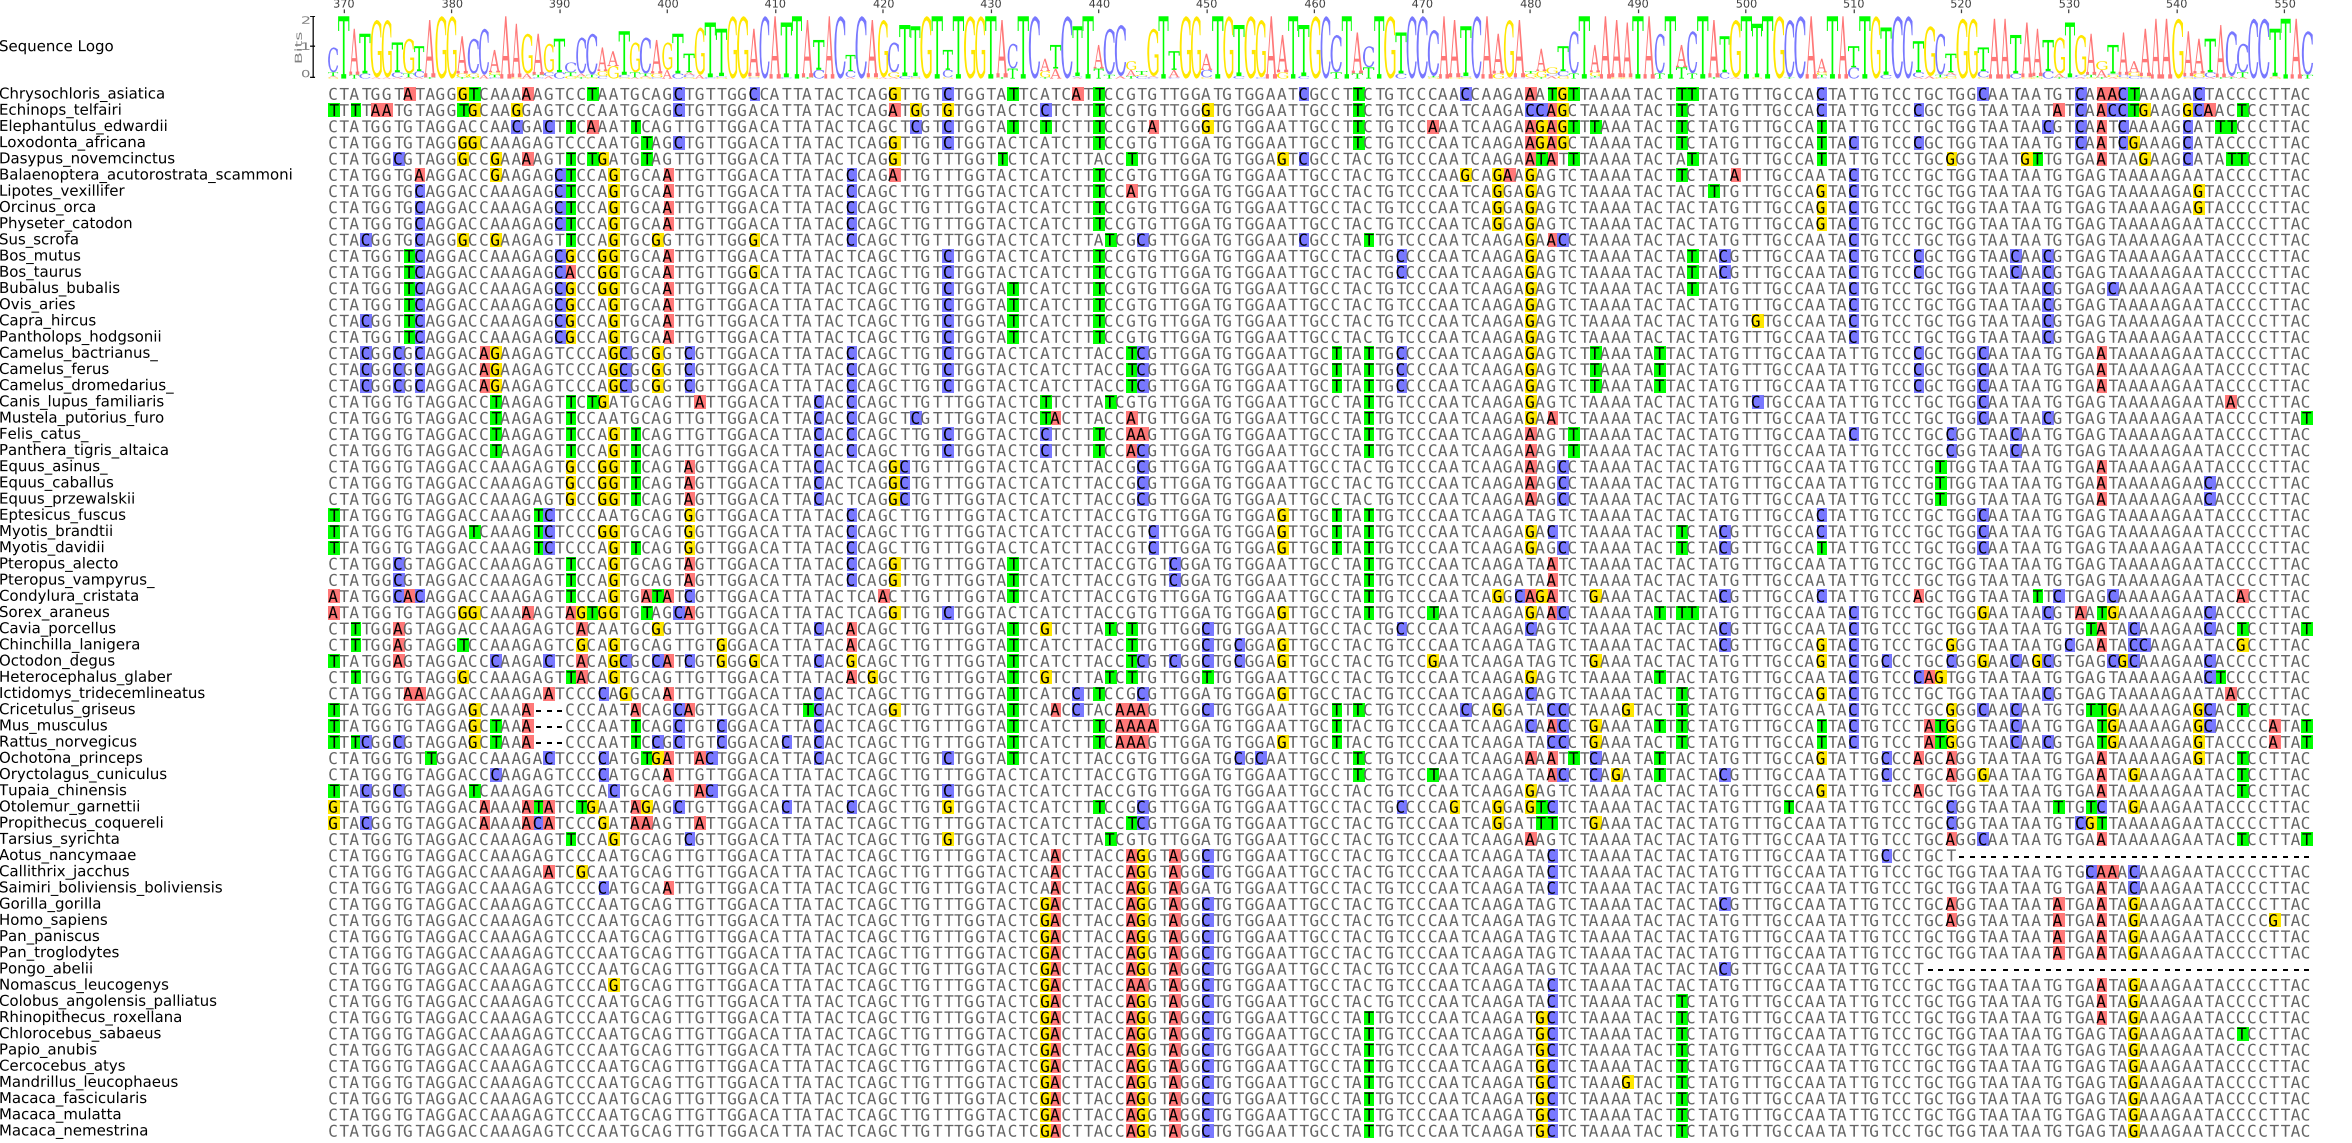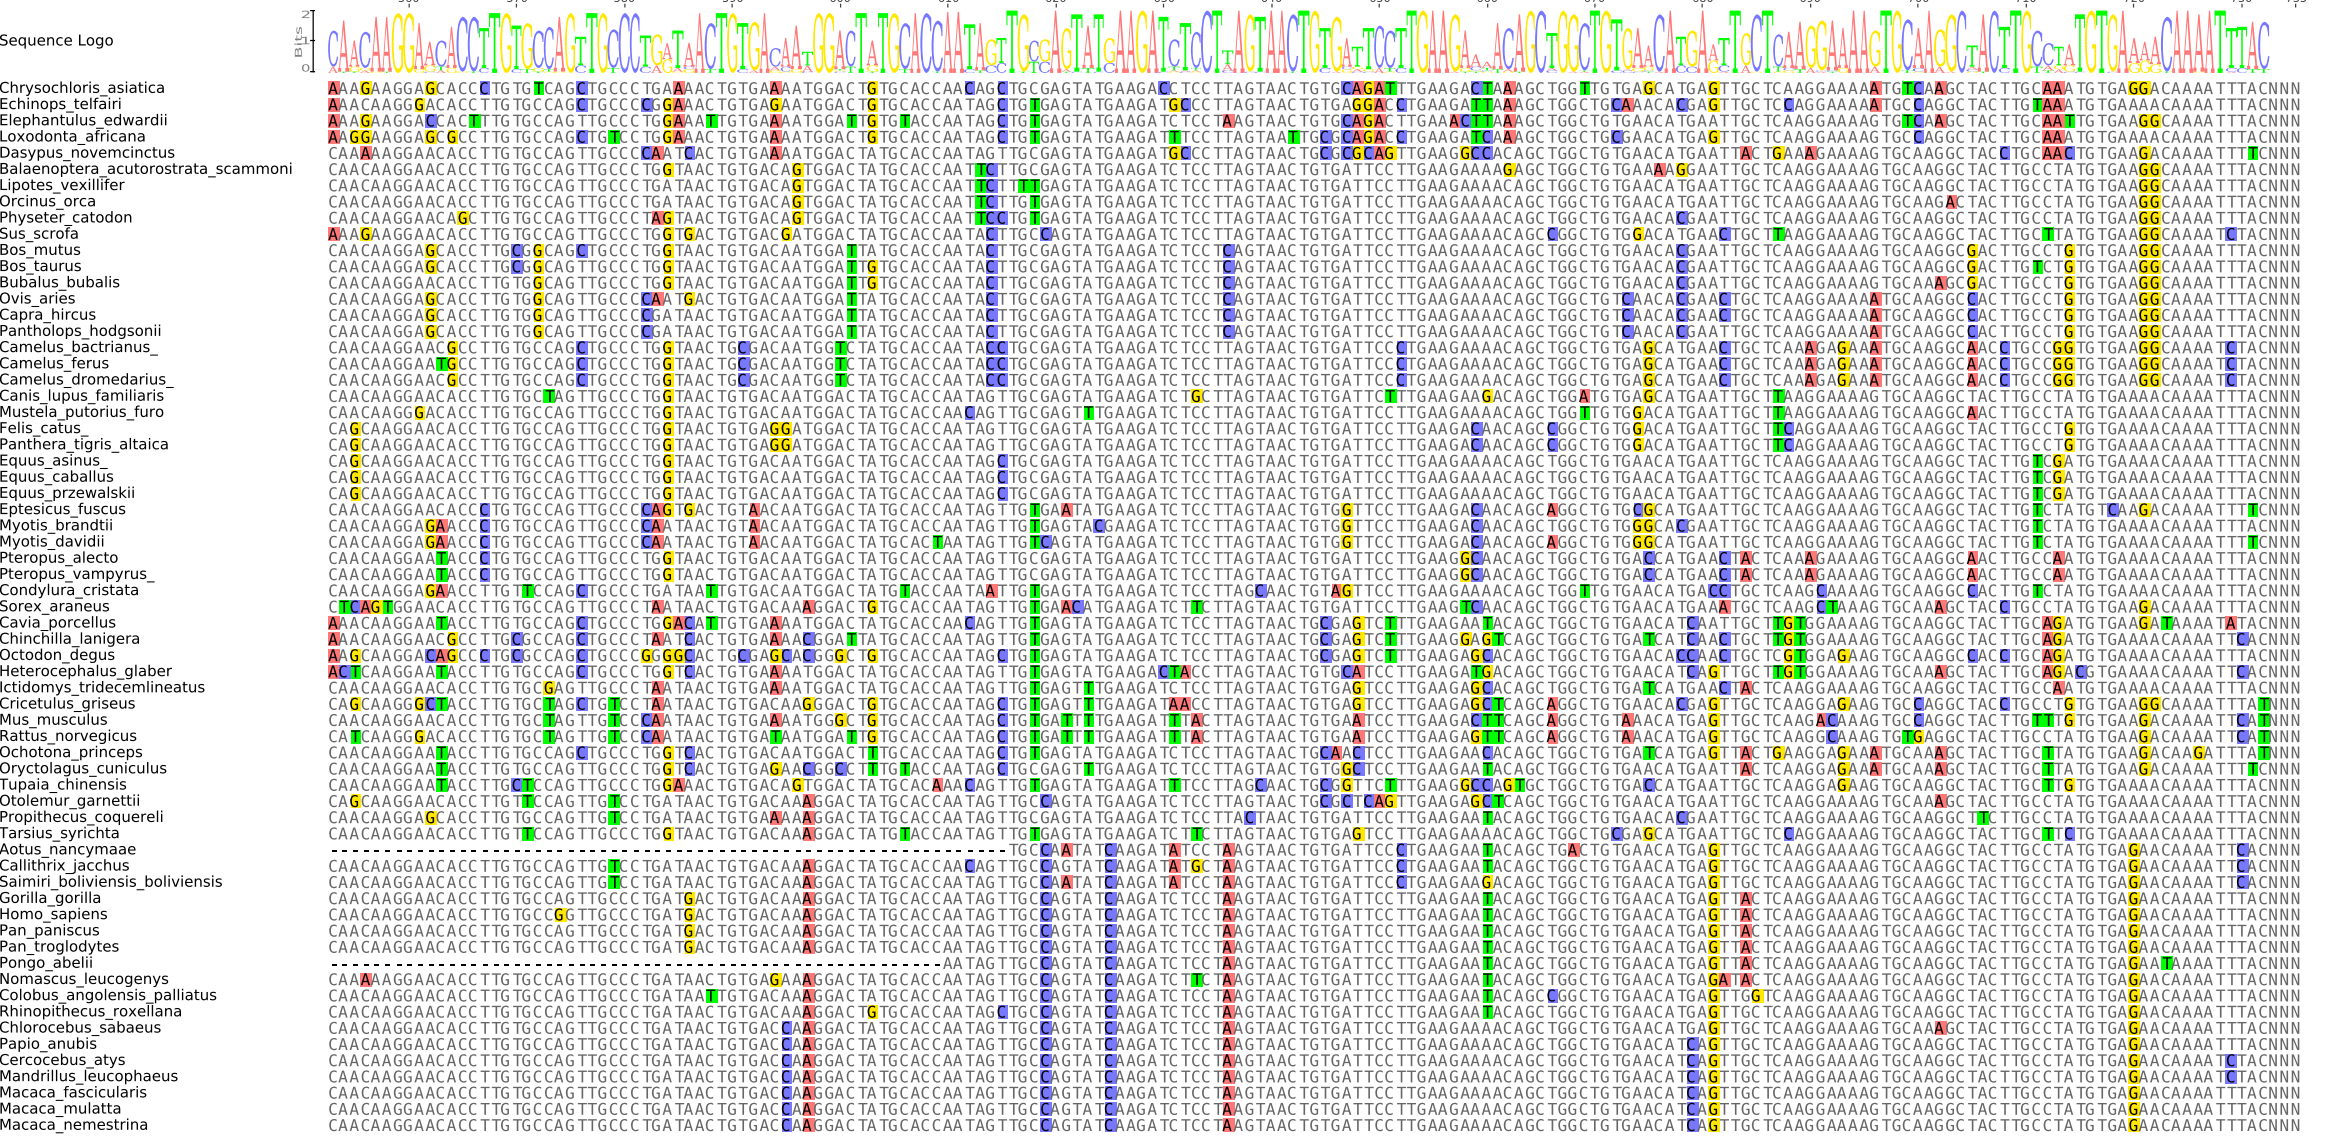

Supplement: 12862_2020_1632_MOESM5_ESM.pdf [file 12862_2020_1632_MOESM5_ESM.pdf]
